# Supplementary material for: Quantitative analysis of pertussis, tetanus, and diphtheria antibodies in sera and breast milk from Tdap vaccinated women using a qualified multiplex assay
Source: PubMed Central journal article supplement (PMC11036809; doi:10.1128/msphere.00527-23), 2024-03-18
Supplement: msphere.00527-23-s0001.pdf [file msphere.00527-23-s0001.pdf]

## Supplemental Material

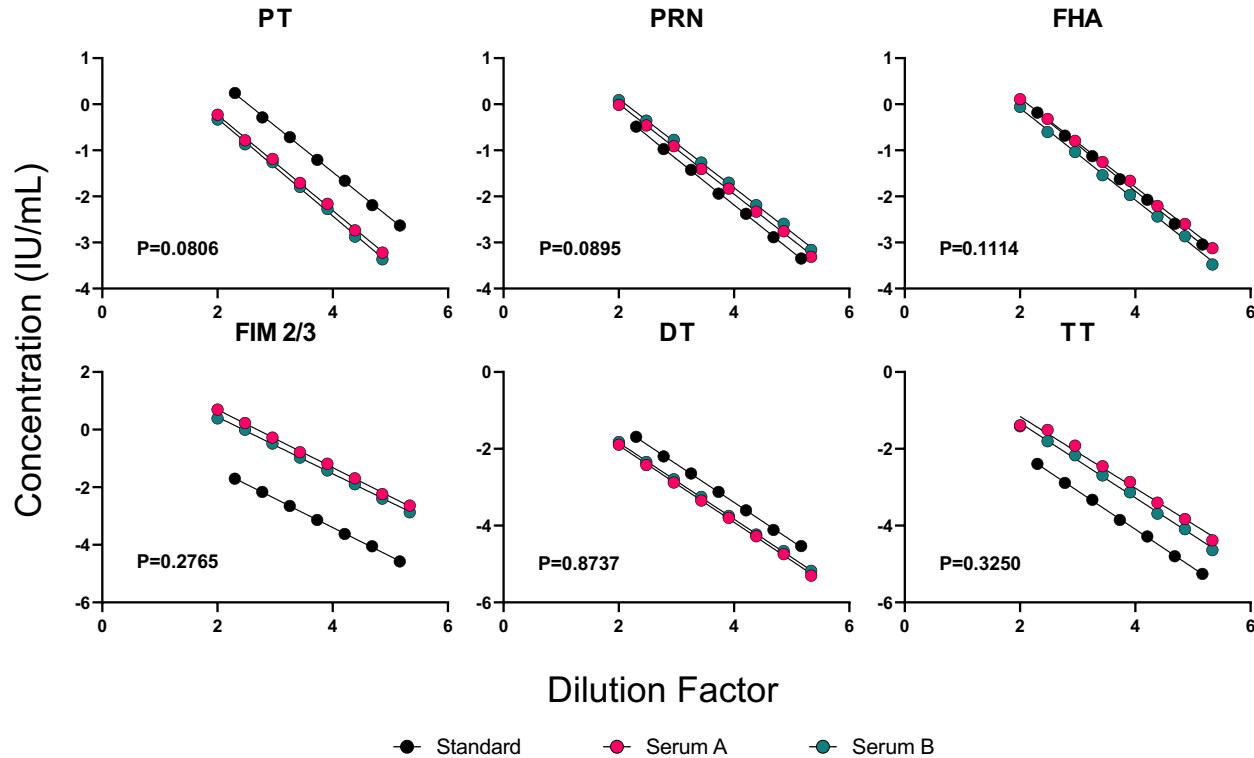

**Fig S1. Parallelism.** The in-house serum IgG standard (black) and serum samples from two different donors, Serum A (pink) and B (teal) tested in the MSD assay, in serial 3-fold dilutions. The concentration of antibodies (y axis) against each antigen (for each dilution tested) was determined and plotted against dilution factors (x-axis); both concentrations and sample dilution factors were log transformed. Linear regression curves are shown. P values (two-tailed) from the test of the null hypothesis that the slopes are identical are shown.  $P > 0.05$  indicates slopes for the in-house standard and serum samples are not statistically different.

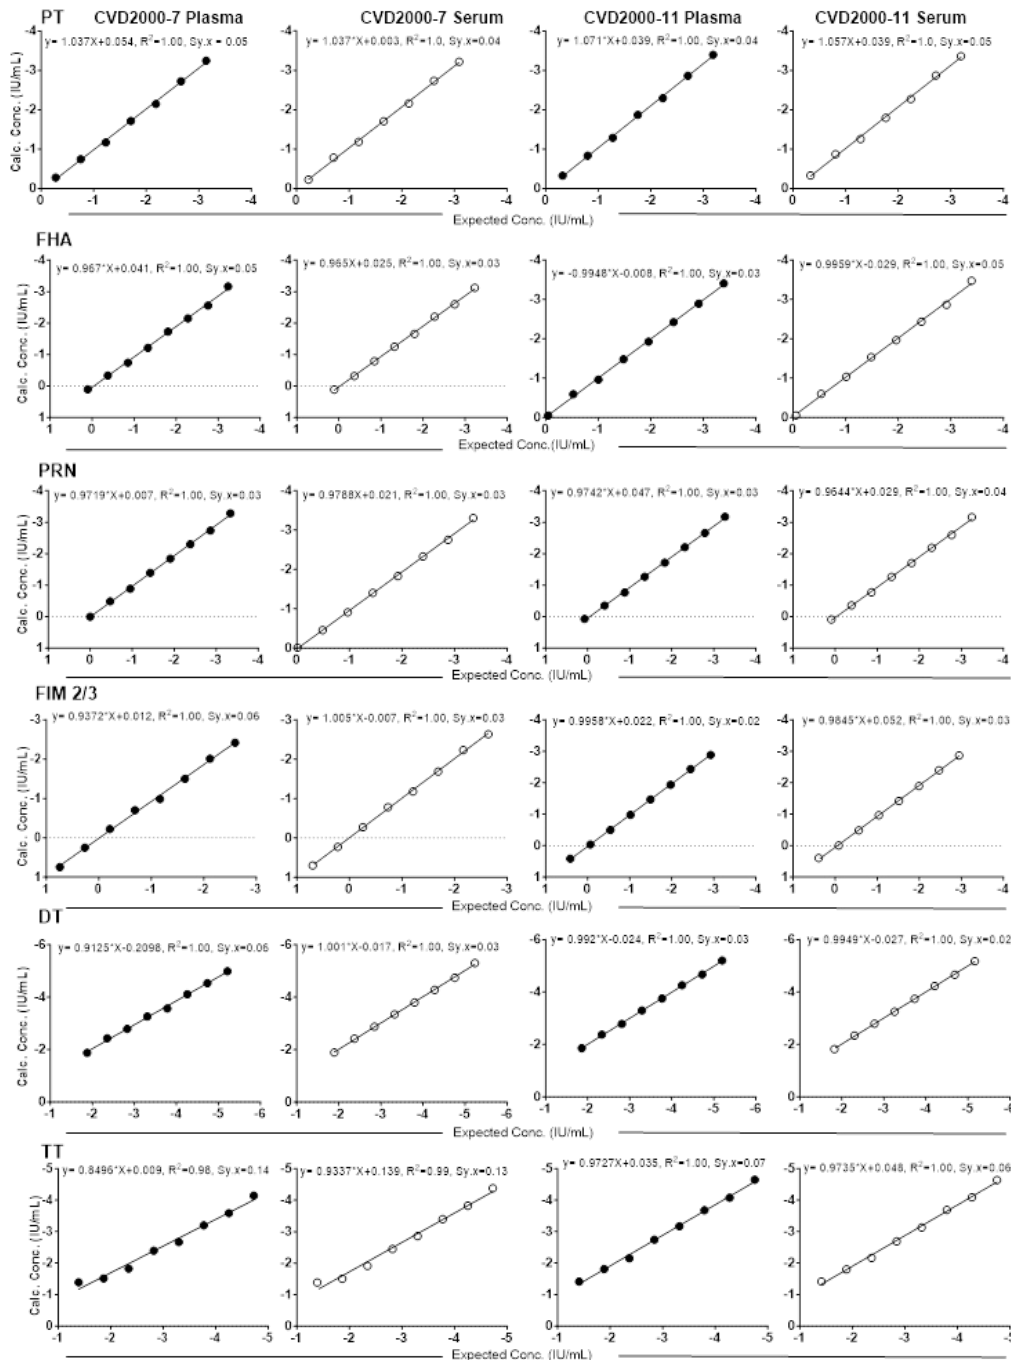

**Fig S2. Dilutional linearity.** Sera (black) and plasma (white circles) with known antibody concentrations were tested in the MSD assay, in serial 3-fold dilutions. The concentration of antibodies calculated for each dilution tested (y axis) was plotted against the expected concentration (x-axis); both were log transformed. Linear regression curves, coefficient of determination ( $R^2$ ) and standard error of the estimate ( $Sy.x$ ) are shown.

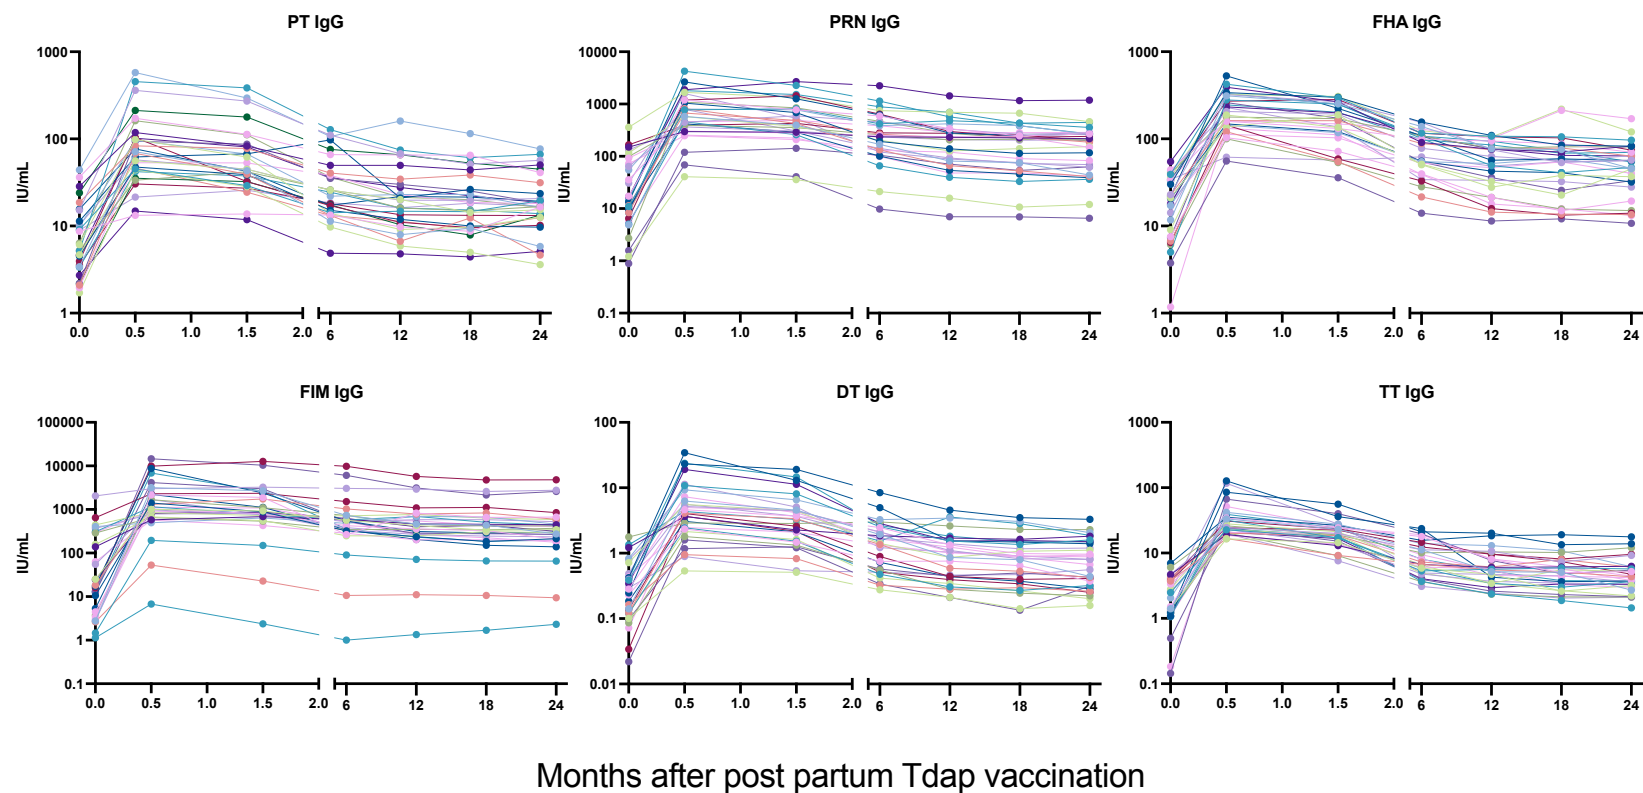

**Fig S3. Individual trajectory of serum IgG responses to Tdap antigens.** Lines represent antibody levels over time for individual subjects who received Tdap (Adacel) post-partum. Data represent titers from 31 women with complete samples from vaccination to month 24 . The kinetics of responses was similar for all individuals and involved a peak for all vaccine antigens 2 weeks post vaccination and subsequent antibody decline.

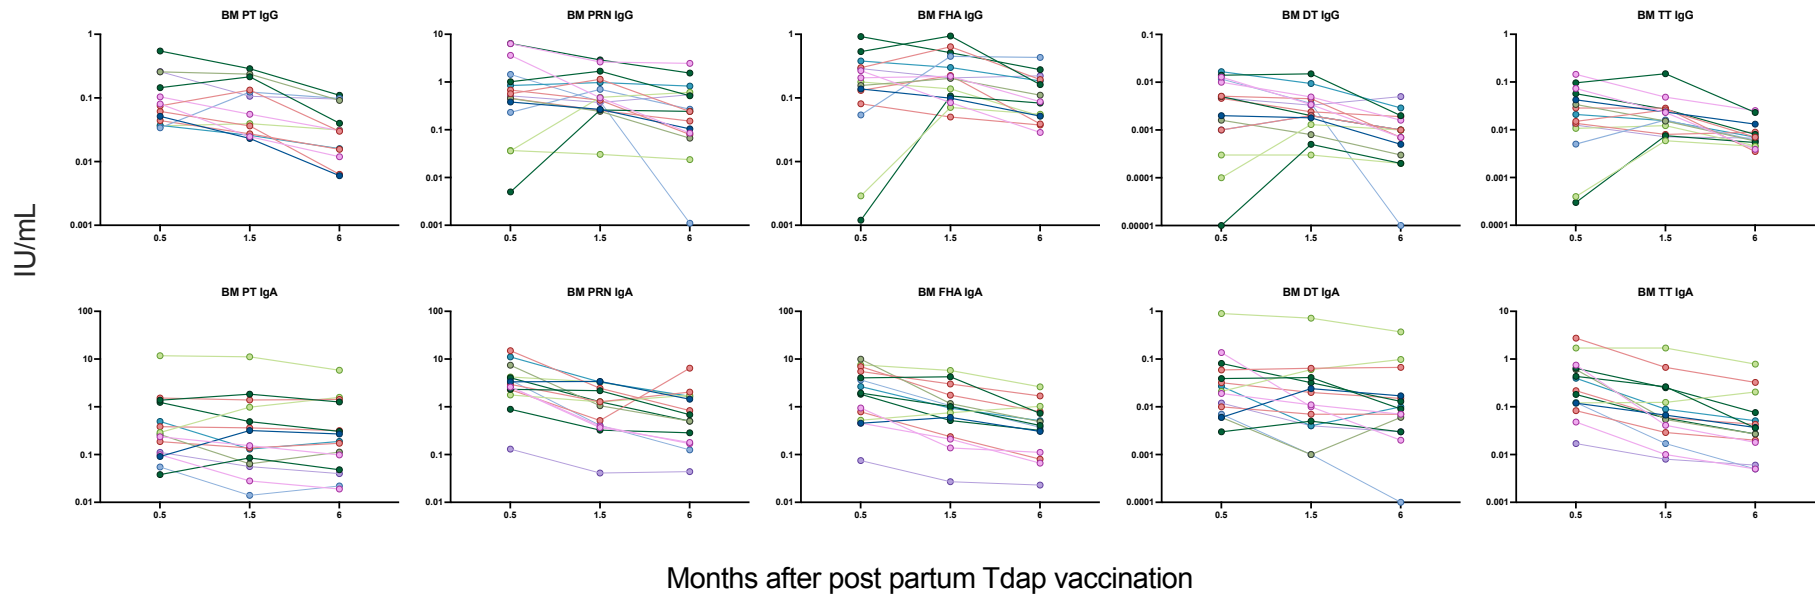

**Fig S4. Individual trajectory of IgG and IgA antibodies to Tdap in breast milk (BM).** Lines represent antibody levels over time from women who received Tdap (Adacel) post-partum. Data represent titers from 13-16 women with complete BM samples from 2 weeks to 6 months post vaccination.
